# Supplementary material
Source: PubMed Central journal article supplement (PMC7099139)
Supplement: JB.00685-19-s0001.pdf [file JB.00685-19-s0001.pdf]

1 **SUPPLEMENTAL MATERIAL FOR: Single-Cell Analysis Reveals that the**  
2 **Enterococcal Sex Pheromone Response Results in Expression of Full-length**  
3 **Conjugation Operon Transcripts in All Induced Cells**

4  
5 Rebecca J. B. Erickson,<sup>a</sup> Arpan A. Bandyopadhyay,<sup>b</sup> Aaron M. T. Barnes,<sup>a,c</sup> Sofie A.  
6 O'Brien,<sup>b</sup> Wei-Shou Hu,<sup>b</sup> Gary M. Dunny<sup>a</sup>

7 <sup>a</sup>Department of Microbiology and Immunology, University of Minnesota, Minneapolis,  
8 Minnesota, USA, <sup>b</sup>Department of Chemical Engineering and Materials Science,  
9 University of Minnesota, Minneapolis, Minnesota, USA, <sup>c</sup>Department of Laboratory  
10 Medicine and Pathology, University of Minnesota, Minneapolis, Minnesota, USA

11

12 **SUPPLEMENTAL TEXT**

13 **Not all induced cells appear to transfer by fluorescent reporter analysis of**  
14 **plasmid induction and transfer.** Fluorescent reporters were designed to examine  
15 functional conjugation by induced cells at the single cell level (1). Microscopic tracking  
16 of the fluorescent expression of individual cells after mixing of donors and recipients  
17 embedded in agar pads allowed observation of donor induction and in some cases,  
18 formation of new transconjugants cells via transfer of the plasmid from an induced  
19 donor to a recipient cell as shown in the main paper (Fig. 2). Figure S1 shows a much  
20 larger field that was imaged as a merge of red, blue, and green fluorescence after 330  
21 minutes of incubation of the embedded mating mixture. It is readily apparent that the  
22 vast majority of the donor cells are surrounded by recipients, with a significant fraction  
23 of this population appearing to be induced (green or yellow cells). However, many

24 uninduced cells (red) surrounded by recipients remained at the end of the experiment.  
25 This may be due to relatively low levels of **C** production in the embedded recipient cells,  
26 Quantification of induction and conjugation on larger populations of mixed donor  
27 and recipient cells by flow cytometry (Fig. S4) also suggested that only a fraction of  
28 induced donors transferred the plasmid, even when recipients were in the majority (1).  
29 The fluorescent reporter is fused to early Q<sub>Op</sub>, so it is possible that some of the cells that  
30 failed to transfer did not express all of the required conjugation proteins because they  
31 lacked full length Q<sub>Op</sub> transcripts. However, this is unlikely, as we tested that the pCF10  
32 derivative containing fluorescent reporters showed very similar transfer frequencies to  
33 those of wild type donors in standard liquid or plate matings.

34

35

## 36 **SUPPLEMENTAL METHODS**

37 **Fluorescent protein reporter strain construction and Microscopic analysis**  
38 **were described in the main paper).**

39 **Flow cytometric analysis of donor induction and conjugation in liquid**  
40 **matings.** Overnight cultures of *E. faecalis* donors (OG1RF+pCF10\_tdTomato\_iGFP)  
41 and recipients (OG1RF\_CFP) were diluted 1:10 in fresh medium and grown to  
42 exponential growth phase without antibiotics for 1h at 37 °C. Donors were induced with  
43 10 ng/ml of the **C** pheromone followed by 1h incubation at 37°C. The donors and  
44 recipients were then mixed in 1:10 ratio and mating was carried out at 37 °C for 2h. The  
45 mating suspensions were fixed using 2% (w/v) PFA for 10 mins at 4 °C. The bacterial  
46 clumps were broken up by EDTA treatment (100 mM), followed by Proteinase K

47 treatment (50 µg/mL, 10 mins at 55 °C). The cell suspension was further sonicated for  
48 10 secs at 20% amplitude. The mating suspensions were then analyzed by flow  
49 cytometry using a Fortessa X-20 flow cytometer. Expression of CFP, GFP, and  
50 tdTomato was measured for 100,000 - 500,000 cells using the 405, 488, and 561 nm  
51 laser excitation lines respectively. The cells were gated and analyzed using FlowJo v8  
52 (Tree Star, Ashland, OR).

53

54

55 **Supplemental figures / legends**

56 **FIGURE S1: Visualization of induction and conjugation via fluorescent reporter**  
57 **protein expression.**

58

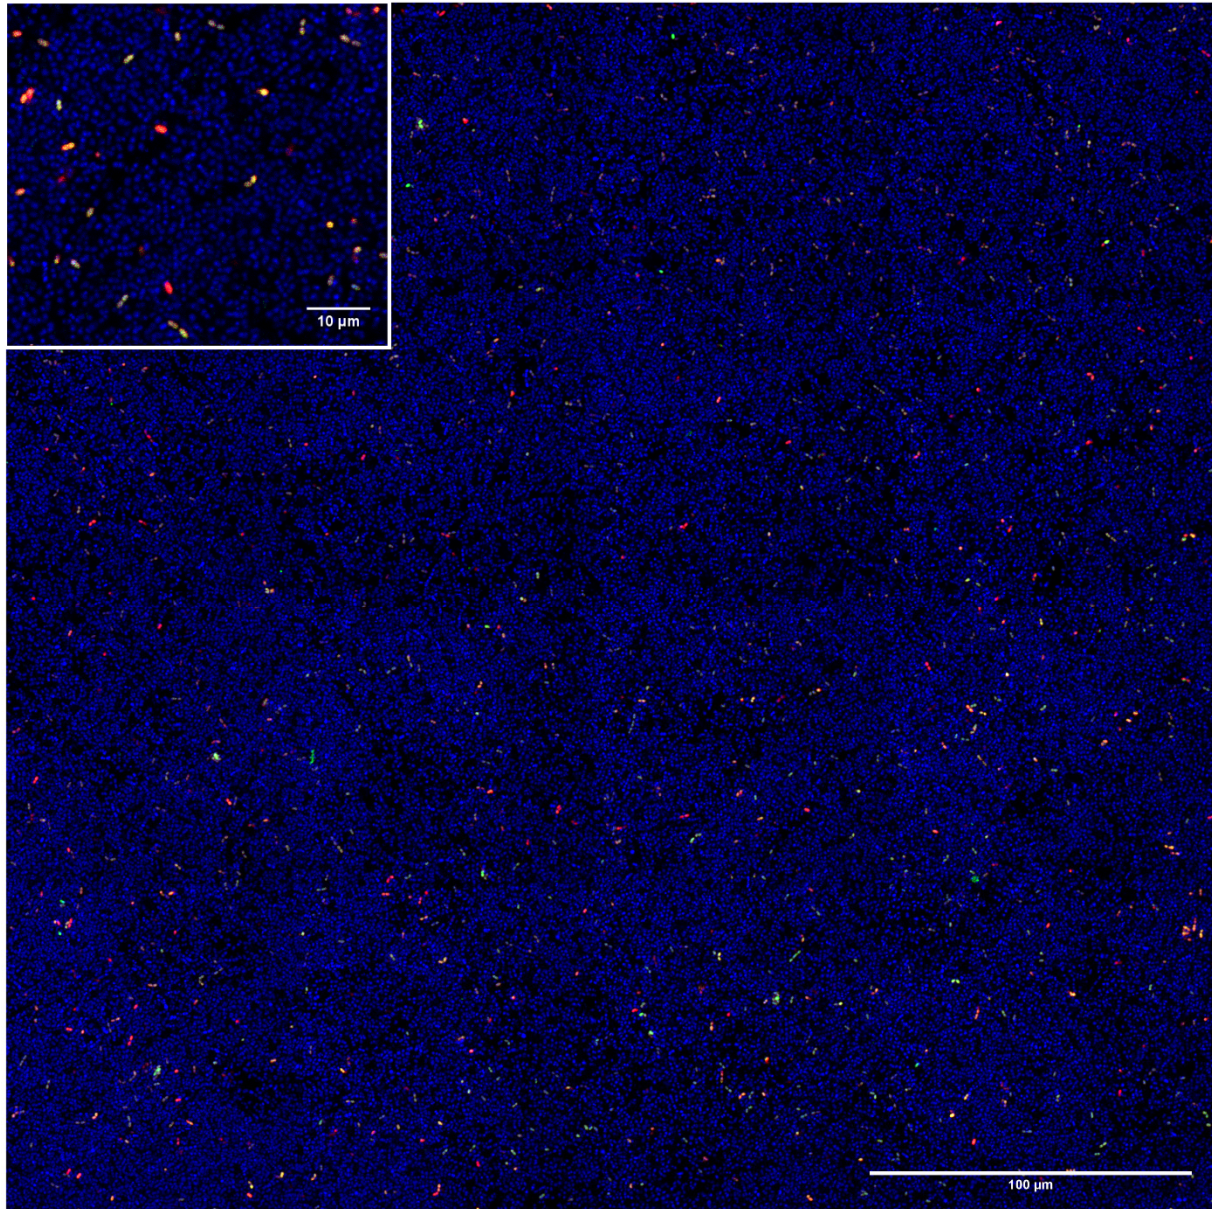

59

60

61 A lawn of *E. faecalis* cells on the surface of the agarose pad. This image is composed of  
62 16 tiled image stacks stitched together (total area: 375μm × 375μm); a small portion of  
63 this image is also shown in Fig. 2. Recipients (blue; Hoechst 33342) and uninduced

64 donors (red; constitutive tdTomato expression) were mixed (D:R=1:100) and  
65 sandwiched between an agarose pad and coverslip-bottomed Petri dish. Donors  
66 express GFP (green) when induced by **C**. The entire field was tracked every 30 mins for  
67 6 hours using time-lapse laser-scanning confocal microscopy; t=330 min shown here.  
68 Note the relative paucity of induced donors relative to uninduced donor cells even  
69 though virtually all of the plasmid-carrying cells (td Tomato positive and/or GFP-positive;  
70 red, green or yellow in this image) are in close proximity to numerous recipients (Blue).

71

72

73 **FIGURE S2: GFP expression increases ~300-fold after pheromone induction.**  
74 Uninduced or induced (10 ng/ml **C** for 60 minutes) exponential phase donor cultures  
75 were treated to disperse large clumps, and subjected to flow cytometry as described in  
76 the supplemental methods. Nearly all cells express robust red fluorescence, indicative  
77 of carriage of pCF10. A. The image demonstrates the lack of green fluorescent cells in  
78 uninduced donor populations. B. The image demonstrates the fidelity of the GFP tag as  
79 a reporter of induction.

80

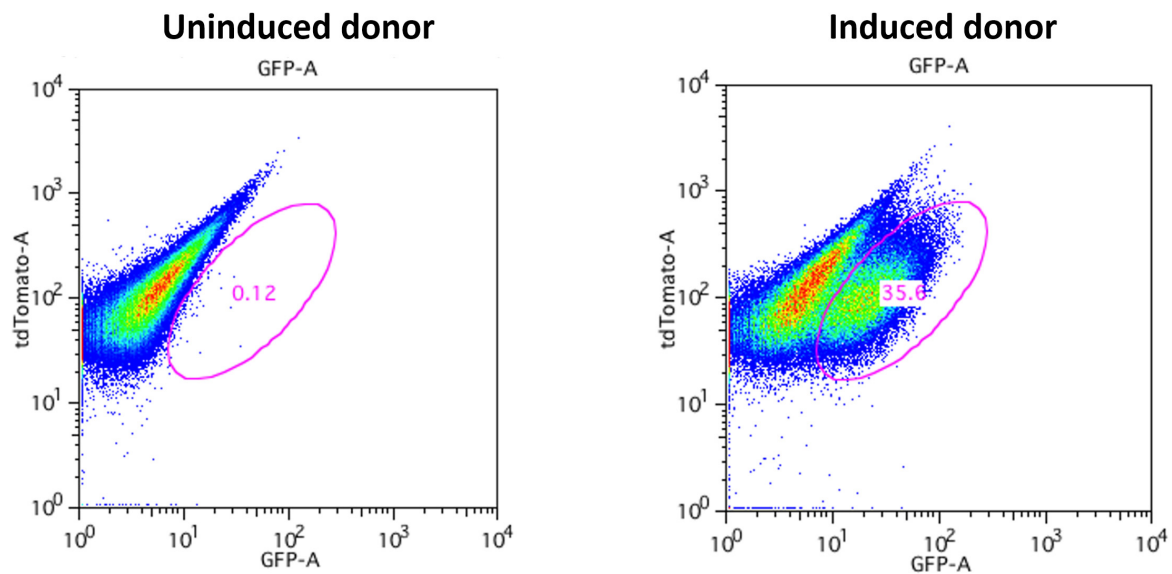

81

82 **FIGURE S3: Results of flow cytometry-based analysis of fluorescent protein**  
83 **reporters of induction and conjugation.**

84

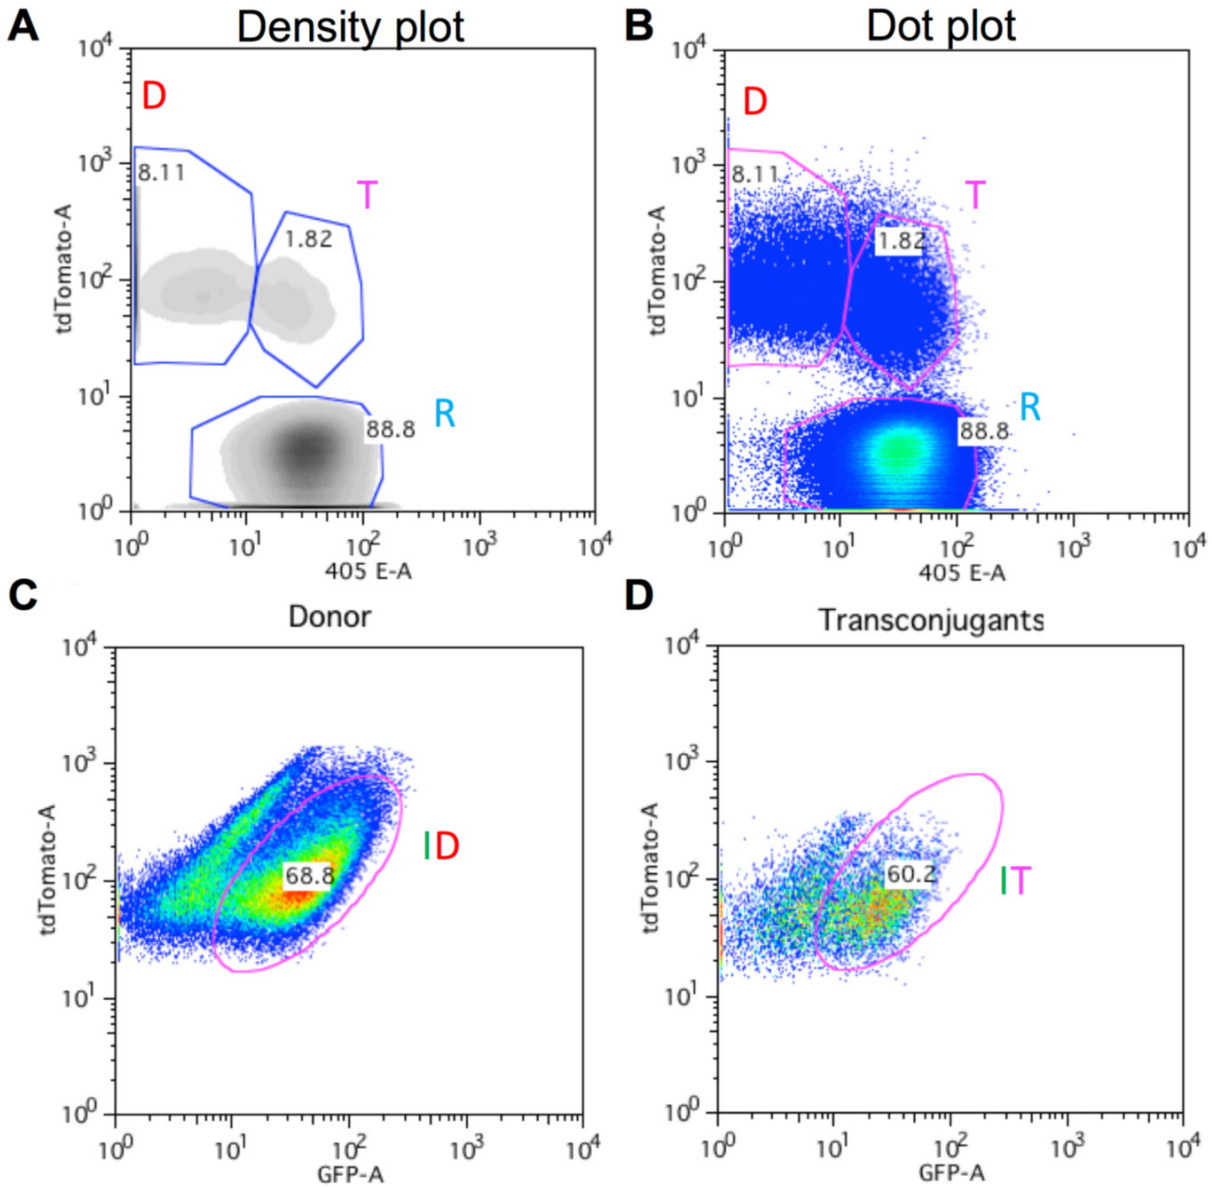

85

86

87 (A) Two-parameter fluorescence density plot. (B), (C), and (D) Two-parameter  
88 fluorescence dot plots. (A-B) Three distinct populations can be identified from  
89 differential fluorescence patterns in the density and dot plots, D: donors, R: recipients,  
90 and T: transconjugants. The donor: recipient ratio is approximately 1:10. Although over  
91 60% of donors were observed to be induced (C) and recipients were in excess,

92 transconjugants only make up about 1.8% of the total population (A) and (B). (D) About  
 93 60% of transconjugants were also observed to be induced.

94

95 **Supplemental Tables**

96

97 **Supplemental Table S1: HCR probe sequences**

98

| HCR probes                                                                            | Sequence<br>(portion of probe homologous to transcripts of interest)                                                                                                                                                                                                            | Amplifier<br>code |
|---------------------------------------------------------------------------------------|---------------------------------------------------------------------------------------------------------------------------------------------------------------------------------------------------------------------------------------------------------------------------------|-------------------|
| <b>Short QL-0</b><br><b>Short QL-1</b>                                                | GCATTGAATTATTCCACAAGCGGGTCATTTTTAGAAAAATGAGCGTGCTTG<br>CACGTTGTTTGCACGGCTCTTACGAGTAGTTCCAGTACAAACAATGCGTG                                                                                                                                                                       | <b>B4</b>         |
| <b>prgA-1</b><br><b>prgA-5</b><br><b>prgA-16</b><br><b>prgA-21</b><br><b>prgA-23</b>  | TCAGGTGTTTTTGGTTGCGCTTGTTCCTGCTGCCCTGACTTCATTTCCCC<br>TCCACGACTTTTTTAGCTTCGTCTACAACCTGCTTGTGGTCAGTCACTGC<br>GATTTTCATGCTTGCCACTTCGCCGTTTTGGTATTGACTACTATCCTCCAG<br>CTTTCAGCACTTTAGCAGACGTTTGTTCAAATCGCTTGTGCTTCCGCAACG<br>CATAGGCTTCTTGTGCTTGAACCACTGCCGCTTCTGCTTTGTTAACTCG     | <b>B1</b>         |
| <b>prgB-3</b><br><b>prgB-5</b><br><b>prgB-8</b><br><b>prgB-16</b><br><b>prgB-22</b>   | TTCGCTTCATTTTCAGCTGGTGCAACTTCTGTTGGCTGCCCTAGAGGTTT<br>TTGAACGCATTGTTGGCCCCAAAATCAGAAAACAAAATCCGCATGGCCACC<br>CCCCATTGCTAAAACAACAGAGCCGTCCGCGTTGGTTTTTCATCATTTGCTG<br>TACGCTAGAATAAAGGCTTGTGGGTCTTTGGCAGAAAATCGTCACCGTGCC<br>TGGCTCTACTGTTGCTTGCAGGTGTTTTTGGTGTGGTGGTACAATCACTG  | <b>B2D1</b>       |
| <b>prgJ-3</b><br><b>prgJ-6</b><br><b>prgJ-17</b><br><b>prgJ-21</b><br><b>prgJ-27</b>  | GACGGTAGTTATCTAAGTGATCTCCCTGATACGCCAATAAAAACGTCTTCC<br>GTCCGTGGCGCAAAAAATAGCTGAACAAAGACAATCGCTCTAAGCCAGTC<br>CGCCATTCTTTACCAGAACCAGACGTTCCGAAAATAAGCCCACTTGGTG<br>CGGTCAACAAGTCCCGCATCCACGTCCGTATAGCTTTTTTAGTAGCGATTC<br>TTGCCCCGCTTTACTGTCTAATAACGTCGTAGGGTTTTGCGTGATACCTG     | <b>B3</b>         |
| <b>pcfC-7</b><br><b>pcfC-10</b><br><b>pcfC-15</b><br><b>pcfC-26</b><br><b>pcfC-27</b> | GTCCAATCTCTGGCAATATCCCACCGTCTGGGTCTGTTGTGATAAAAGCTG<br>TCGTCCCCGGTTCGTTTTTCCACTTCTTTTGTGCTTCAGTGACAGCTTC<br>TCATGGTCAAAAACAGAGTAACGTGCAGCAGCTATCCCTAGAACGCTGGC<br>AAACCAGACACTCGTCTCCTCCAATAAGCGCAACTTCACTCCTGTCAATC<br>TCATCAGTCGGTCTGTGCTAGTTCATCTGCTCGGTTCATGCTGAAAAGC       | <b>B4</b>         |
| <b>pcfG-4</b><br><b>pcfG-18</b><br><b>pcfG-21</b><br><b>pcfG-24</b><br><b>pcfG-29</b> | TCTGATTTTGGATCGAATGTGTACCCGATTTTTTCGTTGAATTGCTGCTTG<br>CCTTATACCCTCCTACAAAGAGCTTTCCAGAATTGCCATAGCCATAATCG<br>TCACAGGTTCTCTTTTTCAGTGGTGTGTTGTCCATTATACAGTCGTAATTGT<br>GCTCTAACATCTTCTCGTCAAGAGTCTCTAAAGTTTTTTCTGCTTCAAGA<br>AGTTTTGGGCTTAATGTCGGTTTTGCTTCTCTGGCTCTTTTTTCTGTACGGC | <b>B5</b>         |

99



100 **Supplemental Table S2: HCR amplifier and fluorophore details**  
 101

| <b>Transcript label</b> | <b>Amplifiers : Fluorophore</b>   |
|-------------------------|-----------------------------------|
| Short QL                | B4H1, B4H2 : Alexa Fluor (AF) 647 |
| prgA                    | B1H1, B1H2 : AF 488               |
| prgB                    | B2H1, B2H2 : AF 488               |
| prgB                    | B2H1, B2H2 : AF 647               |
| prgJ                    | B3H1, B3H2 : AF 488               |
| pcfC                    | B4H1, B4H2 : AF 488               |
| pcfC                    | B4H1, B4H2 : AF 647               |
| pcfG                    | B5H1, B5H2 : AF 488               |

102

103

104 **Supplemental Table S3: Flow cytometry settings (A) and compensation matrix (B)**  
 105 **used for analysis shown in Fig. 3.**

**A.**

| <b>Flow cytometry parameter</b> | <b>Function</b>            | <b>Voltage</b> |
|---------------------------------|----------------------------|----------------|
| FSC-A                           | Cell size                  | 444            |
| SSC-A                           | Cell granularity           | 253            |
| Alexa Fluor 488                 | HCR-labeled transcripts    | 450            |
| Alexa Fluor 647                 | WGA lectin (cell envelope) | 135            |

106

**B.**

|                 | Alexa Fluor 488 | Alexa Fluor 647 |
|-----------------|-----------------|-----------------|
| Alexa Fluor 488 | 100.00          | 0.00            |
| Alexa Fluor 647 | 8.59            | 100.00          |

107

108 **SUPPLEMENTAL REFERENCES**

- 109 1. Bandyopadhyay AA. 2018. Systems analysis of pheromone signaling and  
 110 antibiotic resistance transfer in *Enterococcus faecalis*. Ph.D. thesis. University of  
 111 Minnesota. <http://hdl.handle.net/11299/197623>
